# Supplementary material for: A Map of 3′ DNA Transduction Variants Mediated by Non-LTR Retroelements on 3202 Human Genomes
Source: MDPI journal article supplement (doi:10.3390/biology11071032), 2022-07-08
Supplement: s1 [file s1]

**Table S4.** Source elements of L1 and SVA transductions with their transduced length. This table summarizes the length of progenies derived from each progenitor. Numbers in parentheses are the count of each offspring with the given size.

| Source locus              | TE type      | Transduction length in bp (count)                             |
|---------------------------|--------------|---------------------------------------------------------------|
| chr1:80939203-80945257    | L1/reference | 115 (1), 117 (1), 119 (1), 97 (1)                             |
| chr1:84052389-84058406    | L1/reference | 128 (1), 139 (1), 143 (1), 648 (1)                            |
| chr1:86679080-86685111    | L1/reference | 8 (1), 63 (2)                                                 |
| chr1:118852351-118858380  | L1/reference | 193 (1), 194 (1), 140 (3), 192 (3)                            |
| chr1:187343764-187349794  | L1/reference | 32 (1)                                                        |
| chr1:237019467-237025494  | L1/reference | 48 (1)                                                        |
| chr1:247687173-247693204  | L1/reference | 174 (1), 34 (1)                                               |
| chr3:89460825-89466856    | L1/reference | 427 (1), 888 (1), 936 (1)                                     |
| chr3:136963693-136969736  | L1/reference | 10 (1), 13 (1)                                                |
| chr4:15841546-15847572    | L1/reference | 204 (1)                                                       |
| chr4:21159390-21165421    | L1/reference | 54 (1)                                                        |
| chr4:74717539-74723587    | L1/reference | 202 (1), 682 (1), 686 (1), 696 (1), 929 (1), 997 (1), 691 (3) |
| chr4:79966907-79972933    | L1/reference | 59 (1), 388 (3)                                               |
| chr4:136293494-136299546  | L1/reference | 778 (1), 783 (1), 785 (1), 89 (1), 790 (3)                    |
| chr6:19764892-19770918    | L1/reference | 41 (1), 46 (1)                                                |
| chr6:24811657-24817706    | L1/reference | 90 (2)                                                        |
| chr6:117102131-117108163  | L1/reference | 41 (1), 43 (5)                                                |
| chr7:30439242-30445274    | L1/reference | 28 (1)                                                        |
| chr7:96846650-96852680    | L1/reference | 56 (1), 60 (2)                                                |
| chr8:128453002-128459020  | L1/reference | 84 (1)                                                        |
| chr8:134070756-134076773  | L1/reference | 542 (1)                                                       |
| chr9:112798107-112804159  | L1/reference | 620 (1), 645 (1)                                              |
| chr10:109812437-109818457 | L1/reference | 18 (1), 57 (1), 71 (1), 41 (2)                                |
| chr11:78677772-78683802   | L1/reference | 185 (1)                                                       |
| chr11:93136638-93142673   | L1/reference | 461 (1), 524 (1)                                              |

|                                     |                  |                                                                                                                                 |
|-------------------------------------|------------------|---------------------------------------------------------------------------------------------------------------------------------|
| chr12:126299023-126305038           | L1/reference     | 56 (1)                                                                                                                          |
| chr13:29641706-29647706             | L1/reference     | 35 (1)                                                                                                                          |
| chr13:34480262-34486294             | L1/reference     | 14 (1)                                                                                                                          |
| chr15:54926081-54932099             | L1/reference     | 51 (1)                                                                                                                          |
| chr17:9615985-9622015               | L1/reference     | 25 (1)                                                                                                                          |
| chr17:70458956-70464987             | L1/reference     | 47 (1), 52 (1), 50 (5)                                                                                                          |
| chr22:28663283-28669315             | L1/reference     | 63 (1), 792 (1), 823 (1), 60 (4)                                                                                                |
| chrX:11707248-11713279              | L1/reference     | 103 (1), 110 (1), 152 (1), 169 (1), 26 (1), 419 (1), 42 (1), 50 (1), 56 (1), 91 (1), 104 (2), 41 (8), 47 (10), 30 (26), 37 (35) |
| chrX:11935296-11941314              | L1/reference     | 230 (1), 261 (1), 422 (1), 224 (2), 246 (2), 661 (2), 431 (4), 223 (8)                                                          |
| chrX:147653734-147659767            | L1/reference     | 43 (1)                                                                                                                          |
| chr2_GL582966v2_alt:23969-29986     | L1/reference     | 73 (1)                                                                                                                          |
| chr6_GL000253v2_alt:1206980-1213011 | L1/reference     | 55 (1), 53 (7)                                                                                                                  |
| chr3:55754553                       | L1/non-reference | 101 (1)                                                                                                                         |
| chr3:173031344                      | L1/non-reference | 356 (1)                                                                                                                         |
| chr4:82000744                       | L1/non-reference | 690 (1)                                                                                                                         |
| chr4:111707818                      | L1/non-reference | 119 (1), 173 (1), 79 (1), 92 (1)                                                                                                |
| chr4:131260507                      | L1/non-reference | 164 (1)                                                                                                                         |
| chr5:25708557                       | L1/non-reference | 293 (1)                                                                                                                         |
| chr5:90154965                       | L1/non-reference | 884 (1)                                                                                                                         |
| chr5:137679101                      | L1/non-reference | 365 (1), 53 (1)                                                                                                                 |
| chr6:6280580                        | L1/non-reference | 137 (1)                                                                                                                         |
| chr6:13190802                       | L1/non-reference | 404 (1), 408 (1), 409 (1), 406 (2), 403 (3), 407 (3), 412 (10)                                                                  |
| chr6:29952447                       | L1/non-reference | 401 (1)                                                                                                                         |
| chr6:45358100                       | L1/non-reference | 220 (1)                                                                                                                         |
| chr6:62658303                       | L1/non-reference | 121 (1)                                                                                                                         |
| chr6:102398219                      | L1/non-reference | 636 (1)                                                                                                                         |
| chr8:118145228                      | L1/non-reference | 133 (1)                                                                                                                         |

|                          |                  |                                                   |
|--------------------------|------------------|---------------------------------------------------|
| chr10:57219366           | L1/non-reference | 220 (1)                                           |
| chr12:96518791           | L1/non-reference | 627 (1)                                           |
| chr12:117376655          | L1/non-reference | 450 (1)                                           |
| chr14:30681620           | L1/non-reference | 263 (1), 295 (1)                                  |
| chr14:58753685           | L1/non-reference | 305 (1), 311 (1), 670 (4)                         |
| chr17:69181490           | L1/non-reference | 399 (1)                                           |
| chr1:21387076-21388677   | SVA/reference    | 991 (1)                                           |
| chr1:24832277-24834863   | SVA/reference    | 21 (1), 68 (1), 80 (1)                            |
| chr1:26817473-26818642   | SVA/reference    | 712 (2)                                           |
| chr1:27063473-27065559   | SVA/reference    | 34 (1)                                            |
| chr1:143637104-143638603 | SVA/reference    | 979 (1)                                           |
| chr2:156368891-156370126 | SVA/reference    | 63 (2)                                            |
| chr2:177946154-177947784 | SVA/reference    | 29 (1), 55 (1)                                    |
| chr2:195567221-195569191 | SVA/reference    | 102 (1), 480 (1), 95 (2)                          |
| chr2:216225259-216227598 | SVA/reference    | 39 (2)                                            |
| chr3:48212077-48213101   | SVA/reference    | 424 (1), 428 (1), 432 (1), 433 (1), 92 (1)        |
| chr3:128953643-128954734 | SVA/reference    | 991 (1)                                           |
| chr3:150819421-150821828 | SVA/reference    | 43 (1)                                            |
| chr3:179120452-179121468 | SVA/reference    | 700 (1)                                           |
| chr4:1827284-1828864     | SVA/reference    | 15 (1)                                            |
| chr4:76917857-76918878   | SVA/reference    | 72 (2)                                            |
| chr4:83184624-83187035   | SVA/reference    | 325 (1)                                           |
| chr4:150658775-150661088 | SVA/reference    | 115 (1)                                           |
| chr4:183734757-183736673 | SVA/reference    | 168 (1), 72 (1)                                   |
| chr6:15189275-15190590   | SVA/reference    | 220 (1)                                           |
| chr6:27484095-27485412   | SVA/reference    | 393 (1)                                           |
| chr6:51981373-51982817   | SVA/reference    | 81 (1), 77 (2)                                    |
| chr6:56893617-56896059   | SVA/reference    | 51 (1), 625 (1), 630 (1), 637 (1), 57 (2), 54 (3) |

|                           |               |                                                |
|---------------------------|---------------|------------------------------------------------|
| chr6:122847780-122849162  | SVA/reference | 17 (1), 30 (1), 35 (1), 77 (1), 82 (1), 76 (4) |
| chr7:20667753-20669743    | SVA/reference | 52 (1), 68 (1), 70 (1), 503 (2), 56 (5)        |
| chr7:152584646-152586077  | SVA/reference | 27 (1)                                         |
| chr7:155366080-155367490  | SVA/reference | 23 (1)                                         |
| chr8:28881390-28882478    | SVA/reference | 356 (1)                                        |
| chr8:30245944-30247879    | SVA/reference | 328 (1)                                        |
| chr8:64685736-64687147    | SVA/reference | 587 (1)                                        |
| chr8:128824979-128827120  | SVA/reference | 12 (2)                                         |
| chr9:6806926-6808710      | SVA/reference | 17 (1)                                         |
| chr9:81709536-81711924    | SVA/reference | 73 (1), 83 (1), 84 (1), 87 (1), 88 (1)         |
| chr10:92376425-92377452   | SVA/reference | 450 (2), 449 (5)                               |
| chr10:92673727-92675979   | SVA/reference | 26 (1)                                         |
| chr10:97276514-97277614   | SVA/reference | 30 (1)                                         |
| chr10:99837466-99840119   | SVA/reference | 403 (1)                                        |
| chr11:118330284-118332729 | SVA/reference | 33 (1)                                         |
| chr11:119507011-119508903 | SVA/reference | 82 (1), 85 (1), 90 (1)                         |
| chr12:41300-43319         | SVA/reference | 18 (3)                                         |
| chr12:26785353-26786469   | SVA/reference | 38 (1), 47 (2)                                 |
| chr12:95839858-95841091   | SVA/reference | 43 (1), 47 (1), 60 (1)                         |
| chr14:20506451-20507630   | SVA/reference | 21 (1), 29 (1)                                 |
| chr14:64894264-64896723   | SVA/reference | 140 (1), 585 (1), 590 (1)                      |
| chr14:105110790-105111988 | SVA/reference | 475 (1)                                        |
| chr15:88551730-88554457   | SVA/reference | 427 (1)                                        |
| chr15:89866993-89868511   | SVA/reference | 973 (1)                                        |
| chr17:27211365-27213327   | SVA/reference | 44 (1), 7 (1), 31 (2)                          |
| chr17:28223104-28224648   | SVA/reference | 528 (1)                                        |
| chr17:60550877-60551918   | SVA/reference | 973 (1)                                        |
| chr19:29898333-29901695   | SVA/reference | 416 (1), 434 (1)                               |

|                                     |                   |                                   |
|-------------------------------------|-------------------|-----------------------------------|
| chr20:2824215-2825758               | SVA/reference     | 17 (1), 544 (1), 22 (2)           |
| chr21:17718638-17721106             | SVA/reference     | 12 (1)                            |
| chr22:23853842-23855352             | SVA/reference     | 995 (1), 966 (3)                  |
| chr22:40744153-40746437             | SVA/reference     | 29 (1)                            |
| chrX:29332669-29334200              | SVA/reference     | 40 (1)                            |
| chrX:68325837-68327795              | SVA/reference     | 22 (2)                            |
| chrX:72680888-72681912              | SVA/reference     | 730 (1)                           |
| chr6_GL000253v2_alt:4065841-4067131 | SVA/reference     | 28 (1), 32 (2), 30 (19)           |
| chr2:68079712                       | SVA/non-reference | 181 (1)                           |
| chr6:158217807                      | SVA/non-reference | 173 (1), 192 (1), 201 (1), 91 (1) |
| chr7:101347850                      | SVA/non-reference | 284 (1)                           |
| chr9:125396733                      | SVA/non-reference | 203 (1)                           |
| chr12:104417657                     | SVA/non-reference | 176 (1)                           |
