# Supplementary material for: A Map of 3′ DNA Transduction Variants Mediated by Non-LTR Retroelements on 3202 Human Genomes
Source: MDPI journal article supplement (doi:10.3390/biology11071032), 2022-07-08
Supplement: s1 [file s1]

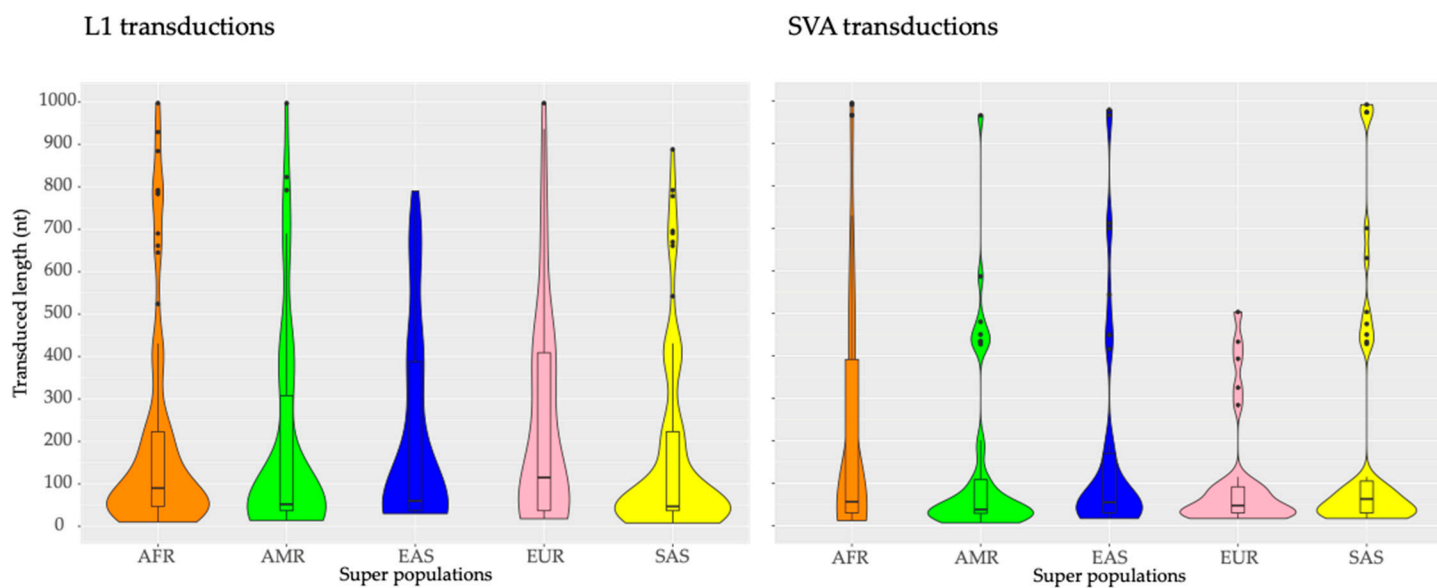

**Figure S1.** Length distribution of transductions mediated by L1s and SVAs across the super-populations.
