# Supplementary material for: A Map of 3′ DNA Transduction Variants Mediated by Non-LTR Retroelements on 3202 Human Genomes
Source: MDPI journal article supplement (doi:10.3390/biology11071032), 2022-07-08
Supplement: s1 [file s1]

**Table S1.** Active non-LTR retroelements in the human genome based on Mills et al' s study <sup>[1]</sup>

| <b>Subfamily</b> |                                        |
|------------------|----------------------------------------|
| <b>LINE</b>      | L1-PA2, Pre-Ta,Ta, Ta-0, Ta-1d, Ta-1nd |
| <b>SVA</b>       | A, B, C, D, E, F                       |

**Reference**

1. Mills, R. E.; Bennett, E. A.; Iskow, R. C.; Devine, S. E., Which transposable elements are active in the human genome? *Trends Genet* **2007**, 23 (4), 183-91. doi:10.1016/j.tig.2007.02.006
